# Supplementary material
Source: publisher figshare collection journal article supplement (https://gsapubs.figshare.com/ndownloader/files/25361291)
Supplement: Supplementary file 1 [file 25361291]

## Sheet: Sheet1
TABLE S2. SR AND ND ISOTOPIC DATA
Sample ID		Stage	Age (Ma)	Rb (ppm)	Sr (ppm)	Rb/Sr	87Sr/86Srp	87Sr/86Sri1	±2σ	Sm (ppm)	Nd (ppm)	Sm/Nd	147Sm/144Nd	±2σ	143Nd/144Ndp	±2σ	eNdp	eNdi†	DMM§
THERM-F3-1		Cenomanian	96.3	17	254	0.0669291	0.708326	0.708065	5e-05	4.6	21.5	0.213953	0.129385	0.0002	0.512114	5e-06	-10.22	-9.45992	1823.39
THERM-MB-2		Cenomanian	98	23	314	0.0732484	0.708158	0.707867	5e-05	7.6	39.6	0.191919	0.116498	0.0002	0.512196	2e-06	-8.62	-7.66948	1667.1
THERM-MA-3		Cenomanian	97	24	412	0.0582524	0.708317	0.708088	5e-05	8.8	40.4	0.217822	N.D.	N.D.	N.D.	N.D.	N.D.	N.D.	N.D.
THERM-BB-4		Cenomanian	96.5	17	486	0.0349794	0.708325	0.708189	5e-05	6.4	34.1	0.187683	0.118208	0.0002	0.512186	3e-06	-8.82	-7.85094	1683.74
THERM-RB-5		Albian	100	11	168	0.0654762	0.70826	0.70799	5e-05	8.4	35.4	0.237288	0.143388	0.0003	0.512053	3e-06	-11.4116	-10.7956	1960.91
THERM-RB-6		Albian	100	12	173	0.0693642	0.708304	0.708017	5e-05	5.3	19.7	0.269036	N.D.	N.D.	N.D.	N.D.	N.D.	N.D.	N.D.
ETHERM-BB-7		Cenomanian	96.5	20	246	0.0813008	0.708244	0.707927	5e-05	4.2	20.5	0.204878	0.122563	0.0002	0.512391	2e-06	-4.82	-3.98466	1362.07
ETHERM-MA-8		Cenomanian	97	14	313	0.0447284	0.708277	0.708101	5e-05	6.2	37.2	0.166667	N.D.	N.D.	N.D.	N.D.	N.D.	N.D.	N.D.
ETHERM-MB-9		Cenomanian	98	14	474	0.0295359	0.708309	0.708192	5e-05	7.7	39.6	0.194444	N.D.	N.D.	N.D.	N.D.	N.D.	N.D.	N.D.
ETHERM-F3-10		Cenomanian	96.3	14	161	0.0869565	0.708848	0.70851	5e-05	7.2	35.5	0.202817	0.126027	0.0004	0.512137	2e-06	-9.77	-8.93511	1778.45
ETHERM-MD-11		Cenomanian	99.2	25	350	0.0714286	0.708744	0.708456	5e-05	8.5	45.2	0.188053	N.D.	N.D.	N.D.	N.D.	N.D.	N.D.	N.D.
ETHERM-ME-12		Cenomanian	99.2	28	410	0.0682927	0.708257	0.707981	5e-05	7.5	40	0.1875	N.D.	N.D.	N.D.	N.D.	N.D.	N.D.	N.D.
TEN-F2-13TOP		Cenomanian	96	29	123	0.235772	0.708339	0.707429	5e-05	5.4	24.9	0.216867	0.137077	0.0003	0.512202	2e-06	-8.51	-7.77164	1695.88
TEN-F2-14MID		Cenomanian	96	32	224	0.142857	0.708102	0.70755	5e-05	6.4	26.6	0.240602	0.144388	0.0004	0.512199	1e-06	-8.56	-8.01653	1715.21
TEN-F2-15BTM		Cenomanian	96	18	75	0.24	0.709164	0.708238	5e-05	5.4	24.9	0.216867	0.133168	0.0004	0.512218	2e-06	-8.19	-7.46403	1661.81
BZR-BB-16BTM		Cenomanian	96.5	9	86	0.104651	0.708791	0.708383	5e-05	4.8	25.4	0.188976	N.D.	N.D.	N.D.	N.D.	N.D.	N.D.	N.D.
BZR-BB-17TOP		Cenomanian	96.5	26	128	0.203125	0.708828	0.708038	5e-05	7.3	31.1	0.234727	N.D.	N.D.	N.D.	N.D.	N.D.	N.D.	N.D.
BZR-MA-18		Cenomanian	97	12	155	0.0774194	0.708644	0.70834	5e-05	8.1	46	0.176087	N.D.	N.D.	N.D.	N.D.	N.D.	N.D.	N.D.
BZR-MB-19		Cenomanian	98.5	13	187	0.0695187	0.708864	0.708588	5e-05	4.8	26.9	0.178439	0.158935	0.0005	0.512127	1e-06	-9.97	-8.90888	1866.03
PR-BB-20		Cenomanian	96.5	26	185	0.140541	0.708595	0.708048	5e-05	3.3	17.1	0.192982	N.D.	N.D.	N.D.	N.D.	N.D.	N.D.	N.D.
PR-MB-21		Cenomanian	98	14	156	0.0897436	0.708895	0.708539	5e-05	7.2	39	0.184615	N.D.	N.D.	N.D.	N.D.	N.D.	N.D.	N.D.
PR-MA-22		Cenomanian	97	11	127	0.0866142	0.708599	0.708258	5e-05	6.9	40.2	0.171642	N.D.	N.D.	N.D.	N.D.	N.D.	N.D.	N.D.
PR-RL-23		Albian	100	9	930	0.00967742	0.708375	0.708335	5e-05	7.3	30.4	0.240132	0.132674	0.0003	0.512125	3e-06	-10.01	-9.41417	1821.59
PR-RB-24		Albian	100	12	1293	0.00928074	0.708364	0.708326	5e-05	7.7	38.8	0.198454	0.12878	0.0002	0.512059	3e-06	-11.29	-10.358	1919.52
CS-F1-25		Cenomanian	95.8	13	100	0.13	0.708683	0.708182	5e-05	4.5	25.7	0.175097	N.D.	N.D.	N.D.	N.D.	N.D.	N.D.	N.D.
CS-F2-26		Cenomanian	96	20	290	0.0689655	0.708231	0.707965	5e-05	6.5	34.5	0.188406	N.D.	N.D.	N.D.	N.D.	N.D.	N.D.	N.D.
CS-MA-27		Cenomanian	97	15	143	0.104895	0.708257	0.707844	5e-05	5	29.9	0.167224	0.102566	0.0002	0.512159	2e-06	-9.34	-8.20716	1696.79
CS-MA-28		Cenomanian	97	55	372	0.147849	0.70873	0.708148	5e-05	6.4	40.8	0.156863	0.125766	0.0002	0.512085	2e-06	-10.79	-9.56968	1864.13
CS-MB-29		Cenomanian	98	20	400	0.05	0.708227	0.708028	5e-05	6.7	37.6	0.178191	N.D.	N.D.	N.D.	N.D.	N.D.	N.D.	N.D.
CS-MB10-30		Cenomanian	98	30	204	0.147059	0.708103	0.707519	5e-05	7.1	37.7	0.188329	N.D.	N.D.	N.D.	N.D.	N.D.	N.D.	N.D.
BEND-MA-31		Cenomanian	97	15	184	0.0815217	0.708293	0.707973	5e-05	4.9	28.9	0.16955	N.D.	N.D.	N.D.	N.D.	N.D.	N.D.	N.D.
BEND-MB-32		Cenomanian	98	25	268	0.0932836	0.708273	0.707902	5e-05	9	47.3	0.190275	N.D.	N.D.	N.D.	N.D.	N.D.	N.D.	N.D.
BEND-MC-33		Cenomanian	99	11	230	0.0478261	0.708228	0.708036	5e-05	7.7	37.6	0.204787	N.D.	N.D.	N.D.	N.D.	N.D.	N.D.	N.D.
BEND-TS3-34		Albian	100.5	8	28	0.285714	0.708287	0.707088	5e-05	9.1	38.1	0.238845	0.136549	0.0003	0.512151	2e-06	-9.5	-8.88744	1790.5
BEND-TS2-35		Albian	101	27	109	0.247706	0.708212	0.707168	5e-05	10.7	49.6	0.215726	0.134369	0.0004	0.512078	2e-06	-10.92	-10.1144	1897.9
WN-SC-36BR		Cenomanian	95.5	21	202	0.10396	0.708677	0.708276	5e-05	6.8	36.8	0.184783	0.115752	0.0003	0.512086	2e-06	-10.77	-9.78976	1838.88
WN-SC-37R		Cenomanian	95.5	23	311	0.073955	0.708464	0.708179	5e-05	5.4	22.8	0.236842	N.D.	N.D.	N.D.	N.D.	N.D.	N.D.	N.D.
WN-SC-38AR		Cenomanian	95.5	15	157	0.0955414	0.70858	0.708212	5e-05	5.4	26.4	0.204545	0.125335	0.0004	0.512065	3e-06	-11.18	-10.3515	1892.03
WN-MB-39		Cenomanian	98	14	232	0.0603448	0.708151	0.707911	5e-05	6.4	32.6	0.196319	N.D.	N.D.	N.D.	N.D.	N.D.	N.D.	N.D.
WN-MA-40		Cenomanian	97	19	533	0.0356473	0.708021	0.707881	5e-05	5.4	30.2	0.178808	N.D.	N.D.	N.D.	N.D.	N.D.	N.D.	N.D.
DV-MB-41OXTOP		Cenomanian	98.5	14	303	0.0462046	0.708096	0.707912	5e-05	6.9	37.5	0.184	N.D.	N.D.	N.D.	N.D.	N.D.	N.D.	N.D.
DV-MB-42RDCDMID		Cenomanian	98	16	390	0.0410256	0.708059	0.707896	5e-05	6.6	34.3	0.19242	N.D.	N.D.	N.D.	N.D.	N.D.	N.D.	N.D.
DV-MB-43OXBTM		Cenomanian	98	22	324	0.0679012	0.708083	0.707813	5e-05	8.1	43.8	0.184932	N.D.	N.D.	N.D.	N.D.	N.D.	N.D.	N.D.
DV-MA-44		Cenomanian	97	15	256	0.0585938	0.708626	0.708396	5e-05	4.9	28.9	0.16955	0.103422	0.0003	0.512134	2e-06	-9.83	-8.71321	1737.98
DV-MA-45		Cenomanian	97	15	238	0.0630252	0.70831	0.708062	5e-05	6.7	38.2	0.175393	0.110471	0.0003	0.51213	2e-06	-9.91	-8.83713	1758.87
DV-MC-46		Cenomanian	99	16	205	0.0780488	0.708054	0.707741	5e-05	8.1	42.6	0.190141	N.D.	N.D.	N.D.	N.D.	N.D.	N.D.	N.D.
DV-MC-47		Cenomanian	99	9	305	0.0295082	0.708019	0.7079	5e-05	5.4	22	0.245455	0.147659	0.0003	0.512131	3e-06	-9.89	-9.35702	1838.93
ANG1		Cenomanian	98.3*	15	83	0.180723	0.708297	0.707584	5e-05	12.4	50.8	0.244094	0.151187	0.0003	0.51213	2e-06	-9.91	-9.37489	1846.06
ANG2A		Cenomanian	97.19*	23	525	0.0438095	0.707797	0.707626	5e-05	10.1	62.8	0.160828	N.D.	N.D.	N.D.	N.D.	N.D.	N.D.	N.D.
ANG2B		Cenomanian	96.5*	8	412	0.0194175	0.707877	0.707802	5e-05	6.9	34.3	0.201166	N.D.	N.D.	N.D.	N.D.	N.D.	N.D.	N.D.
ANG2C		Cenomanian	96.87*	8	256	0.03125	0.707717	0.707596	5e-05	15.5	73.4	0.211172	N.D.	N.D.	N.D.	N.D.	N.D.	N.D.	N.D.
ANG3A		Cenomanian	96*	2	152	0.0131579	0.707669	0.707618	5e-05	8.8	54.9	0.160291	N.D.	N.D.	N.D.	N.D.	N.D.	N.D.	N.D.
ANG3B		Cenomanian	95.8*	2	46	0.0434783	0.707875	0.707708	5e-05	7.7	45.6	0.16886	0.0874767	0.0002	0.512219	2e-06	-8.17	-7.07455	1569.26
ANG4A		Campanian	83	3	58	0.0517241	0.707197	0.707023	5e-05	8.2	48.2	0.170124	N.D.	N.D.	N.D.	N.D.	N.D.	N.D.	N.D.
ANG4B		Campanian	82.62*	2	35	0.0571429	0.707542	0.707352	5e-05	6.6	38.8	0.170103	N.D.	N.D.	N.D.	N.D.	N.D.	N.D.	N.D.
ANG4C		Campanian	80.8*	3	19	0.157895	0.706969	0.706457	5e-05	4.5	26.9	0.167286	0.109438	0.0002	0.512458	3e-06	-3.51	-2.5734	1208.9
W-ANG1A		Campanian	80.6	2	105	0.0190476	0.707341	0.707278	5e-05	10.2	56.5	0.180531	0.111562	0.0002	0.512058	2e-06	-11.31	-10.4478	1858.72
W-ANG1B		Campanian	80.5	2	37	0.0540541	0.707419	0.707241	5e-05	8.6	49.6	0.173387	N.D.	N.D.	N.D.	N.D.	N.D.	N.D.	N.D.
W-ANG1C		Campanian	80.4	3	22	0.136364	0.707508	0.707062	5e-05	4.9	29.8	0.16443	N.D.	N.D.	N.D.	N.D.	N.D.	N.D.	N.D.
W-ANG1D		Campanian	80.3	3	75	0.04	0.706845	0.706715	5e-05	7.2	41.2	0.174757	N.D.	N.D.	N.D.	N.D.	N.D.	N.D.	N.D.
W-ANG1E		Campanian	80.2	4	52	0.0769231	0.707939	0.707689	5e-05	4.5	25.5	0.176471	N.D.	N.D.	N.D.	N.D.	N.D.	N.D.	N.D.
W-ANG1F		Campanian	80.1*	12	127	0.0944882	0.707169	0.706865	5e-05	8	54.6	0.14652	N.D.	N.D.	N.D.	N.D.	N.D.	N.D.	N.D.
W-ANG1G		Campanian	79.71*	2	18	0.111111	0.706771	0.706416	5e-05	1.6	8	0.2	0.121631	0.0002	0.512344	2e-06	-5.74	-5.01917	1413.61
18MD-TS2.5-1		Albian	100.9	33	663	0.0497738	0.7087	0.7085	5e-05	14.1	59.6	0.236577	N.D.	N.D.	N.D.	N.D.	N.D.	N.D.	N.D.
18MD-TS2-1		Albian	101	18	104	0.173077	0.71091	0.71021	5e-05	3.4	16.8	0.202381	N.D.	N.D.	N.D.	N.D.	N.D.	N.D.	N.D.
18MD-TS1.5-1		Albian	101.2	75	218	0.344037	0.70932	0.70792	5e-05	7	35.7	0.196078	N.D.	N.D.	N.D.	N.D.	N.D.	N.D.	N.D.
18MD-TS1-1		Albian	101.5	11	110	0.1	0.70867	0.70827	5e-05	11.6	56.1	0.206774	N.D.	N.D.	N.D.	N.D.	N.D.	N.D.	N.D.
18MD-TS3.5-1		Albian	100.3	15	48	0.3125	0.70953	0.70827	5e-05	12.6	62.8	0.200637	N.D.	N.D.	N.D.	N.D.	N.D.	N.D.	N.D.
18MD-TS3.6-1		Albian	100.1	35	62	0.564516	0.70943	0.70717	5e-05	9.9	56.4	0.175532	N.D.	N.D.	N.D.	N.D.	N.D.	N.D.	N.D.
18MTS-M2-1		Maastrichtian	72.2	88	175	0.502857	0.71242	0.71101	5e-05	6.3	34.8	0.181034	N.D.	N.D.	N.D.	N.D.	N.D.	N.D.	N.D.
18MTS-M2-2		Maastrichtian	72.1	62	279	0.222222	0.71133	0.7107	5e-05	4.2	26.5	0.158491	N.D.	N.D.	N.D.	N.D.	N.D.	N.D.	N.D.
18MTS-M2-3		Maastrichtian	72	55	262	0.209924	0.71135	0.71076	5e-05	4.8	28.8	0.166667	N.D.	N.D.	N.D.	N.D.	N.D.	N.D.	N.D.
18MTS-M1-4		Maastrichtian	70.1	31	335	0.0925373	0.71098	0.71072	5e-05	3.7	20.4	0.181373	N.D.	N.D.	N.D.	N.D.	N.D.	N.D.	N.D.
18MTS-M1-5		Maastrichtian	70	84	114	0.736842	0.71174	0.70967	5e-05	5.6	32.8	0.170732	N.D.	N.D.	N.D.	N.D.	N.D.	N.D.	N.D.
18SC-UCLI-1		Aptian	110	11	133	0.0827068	0.70768	0.70725	5e-05	1.8	9.8	0.183673	N.D.	N.D.	N.D.	N.D.	N.D.	N.D.	N.D.
18SC-UCLL-1		Aptian	111	11	126	0.0873016	0.70765	0.70719	5e-05	4.7	24.3	0.193416	N.D.	N.D.	N.D.	N.D.	N.D.	N.D.	N.D.
18SC-UCLO-1		Aptian	112	49	337	0.145401	0.70759	0.70683	5e-05	34.1	149	0.228859	N.D.	N.D.	N.D.	N.D.	N.D.	N.D.	N.D.
18SC-UCLT-1		Aptian	113	19	105	0.180952	0.7077	0.70676	5e-05	0.9	4.2	0.214286	N.D.	N.D.	N.D.	N.D.	N.D.	N.D.	N.D.
18SC-UCLW-1		Aptian	114	53	72	0.736111	0.70845	0.70461	5e-05	4.7	22.6	0.207965	N.D.	N.D.	N.D.	N.D.	N.D.	N.D.	N.D.
18AD-MT-lowestbottom		Campanian	82	85	221	0.384615	0.70931	0.70823	5e-05	4.5	24.1	0.186722	N.D.	N.D.	N.D.	N.D.	N.D.	N.D.	N.D.
18AD-MT-lowestmiddle		Campanian	81.8	63	848	0.0742925	0.70871	0.7085	5e-05	5.5	29.5	0.186441	N.D.	N.D.	N.D.	N.D.	N.D.	N.D.	N.D.
18AD-MT-lowesttop		Campanian	81.6	120	277	0.433213	0.70964	0.70843	5e-05	5	26.5	0.188679	N.D.	N.D.	N.D.	N.D.	N.D.	N.D.	N.D.
18AD-MT-B1		Campanian	81.4	66	249	0.26506	0.70923	0.70849	5e-05	5.4	29.3	0.1843	N.D.	N.D.	N.D.	N.D.	N.D.	N.D.	N.D.
18AD-MT-B2		Campanian	81.2	64	291	0.219931	0.70915	0.70853	5e-05	6.2	33.7	0.183976	N.D.	N.D.	N.D.	N.D.	N.D.	N.D.	N.D.
18HB-CY-1		Campanian	83	32	645	0.0496124	0.71009	0.70992	5e-05	6.9	34.5	0.2	N.D.	N.D.	N.D.	N.D.	N.D.	N.D.	N.D.
18HB-CY-2		Campanian	82.8	42	343	0.122449	0.70904	0.70862	5e-05	5.8	28.3	0.204947	N.D.	N.D.	N.D.	N.D.	N.D.	N.D.	N.D.
18HB-CY-3		Campanian	82.6	113	136	0.830882	0.70909	0.70625	5e-05	5.5	28.6	0.192308	N.D.	N.D.	N.D.	N.D.	N.D.	N.D.	N.D.
*Age calculated using U-Pb on zircon phenocrysts
†Initial ratio calculated using measured/estimated age
§Depleted mantle model age calculated with 2-step model
